# Supplementary material for: Metabolomics-based combination of GH and NVB in the treatment of NSCLC lung cancer recurrence
Source: PubMed Central journal article supplement (PMC11660129; doi:10.7150/jca.102722), 2025-01-01
Supplement: jcav16p0265s1.pdf [file jcav16p0265s1.pdf]

手术当天

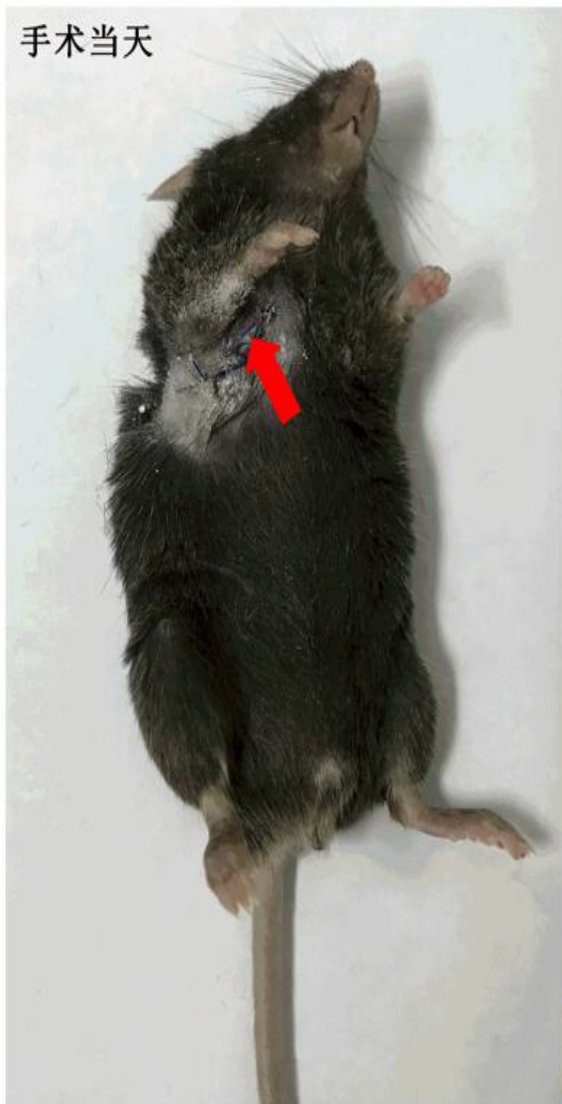

术后6天

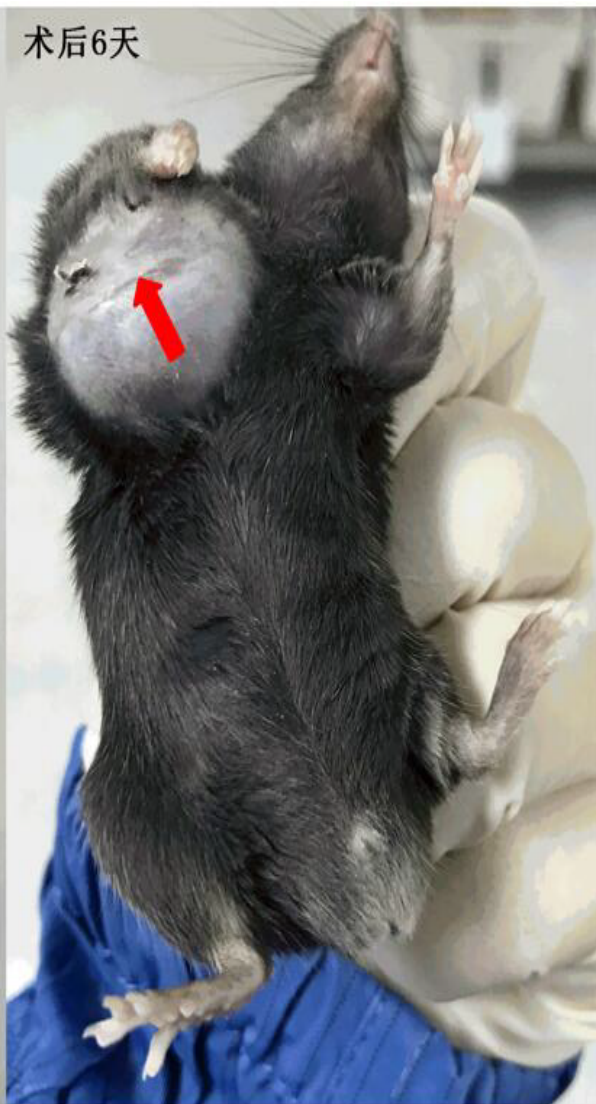



# Valine, leucine and isoleucine biosynthesis

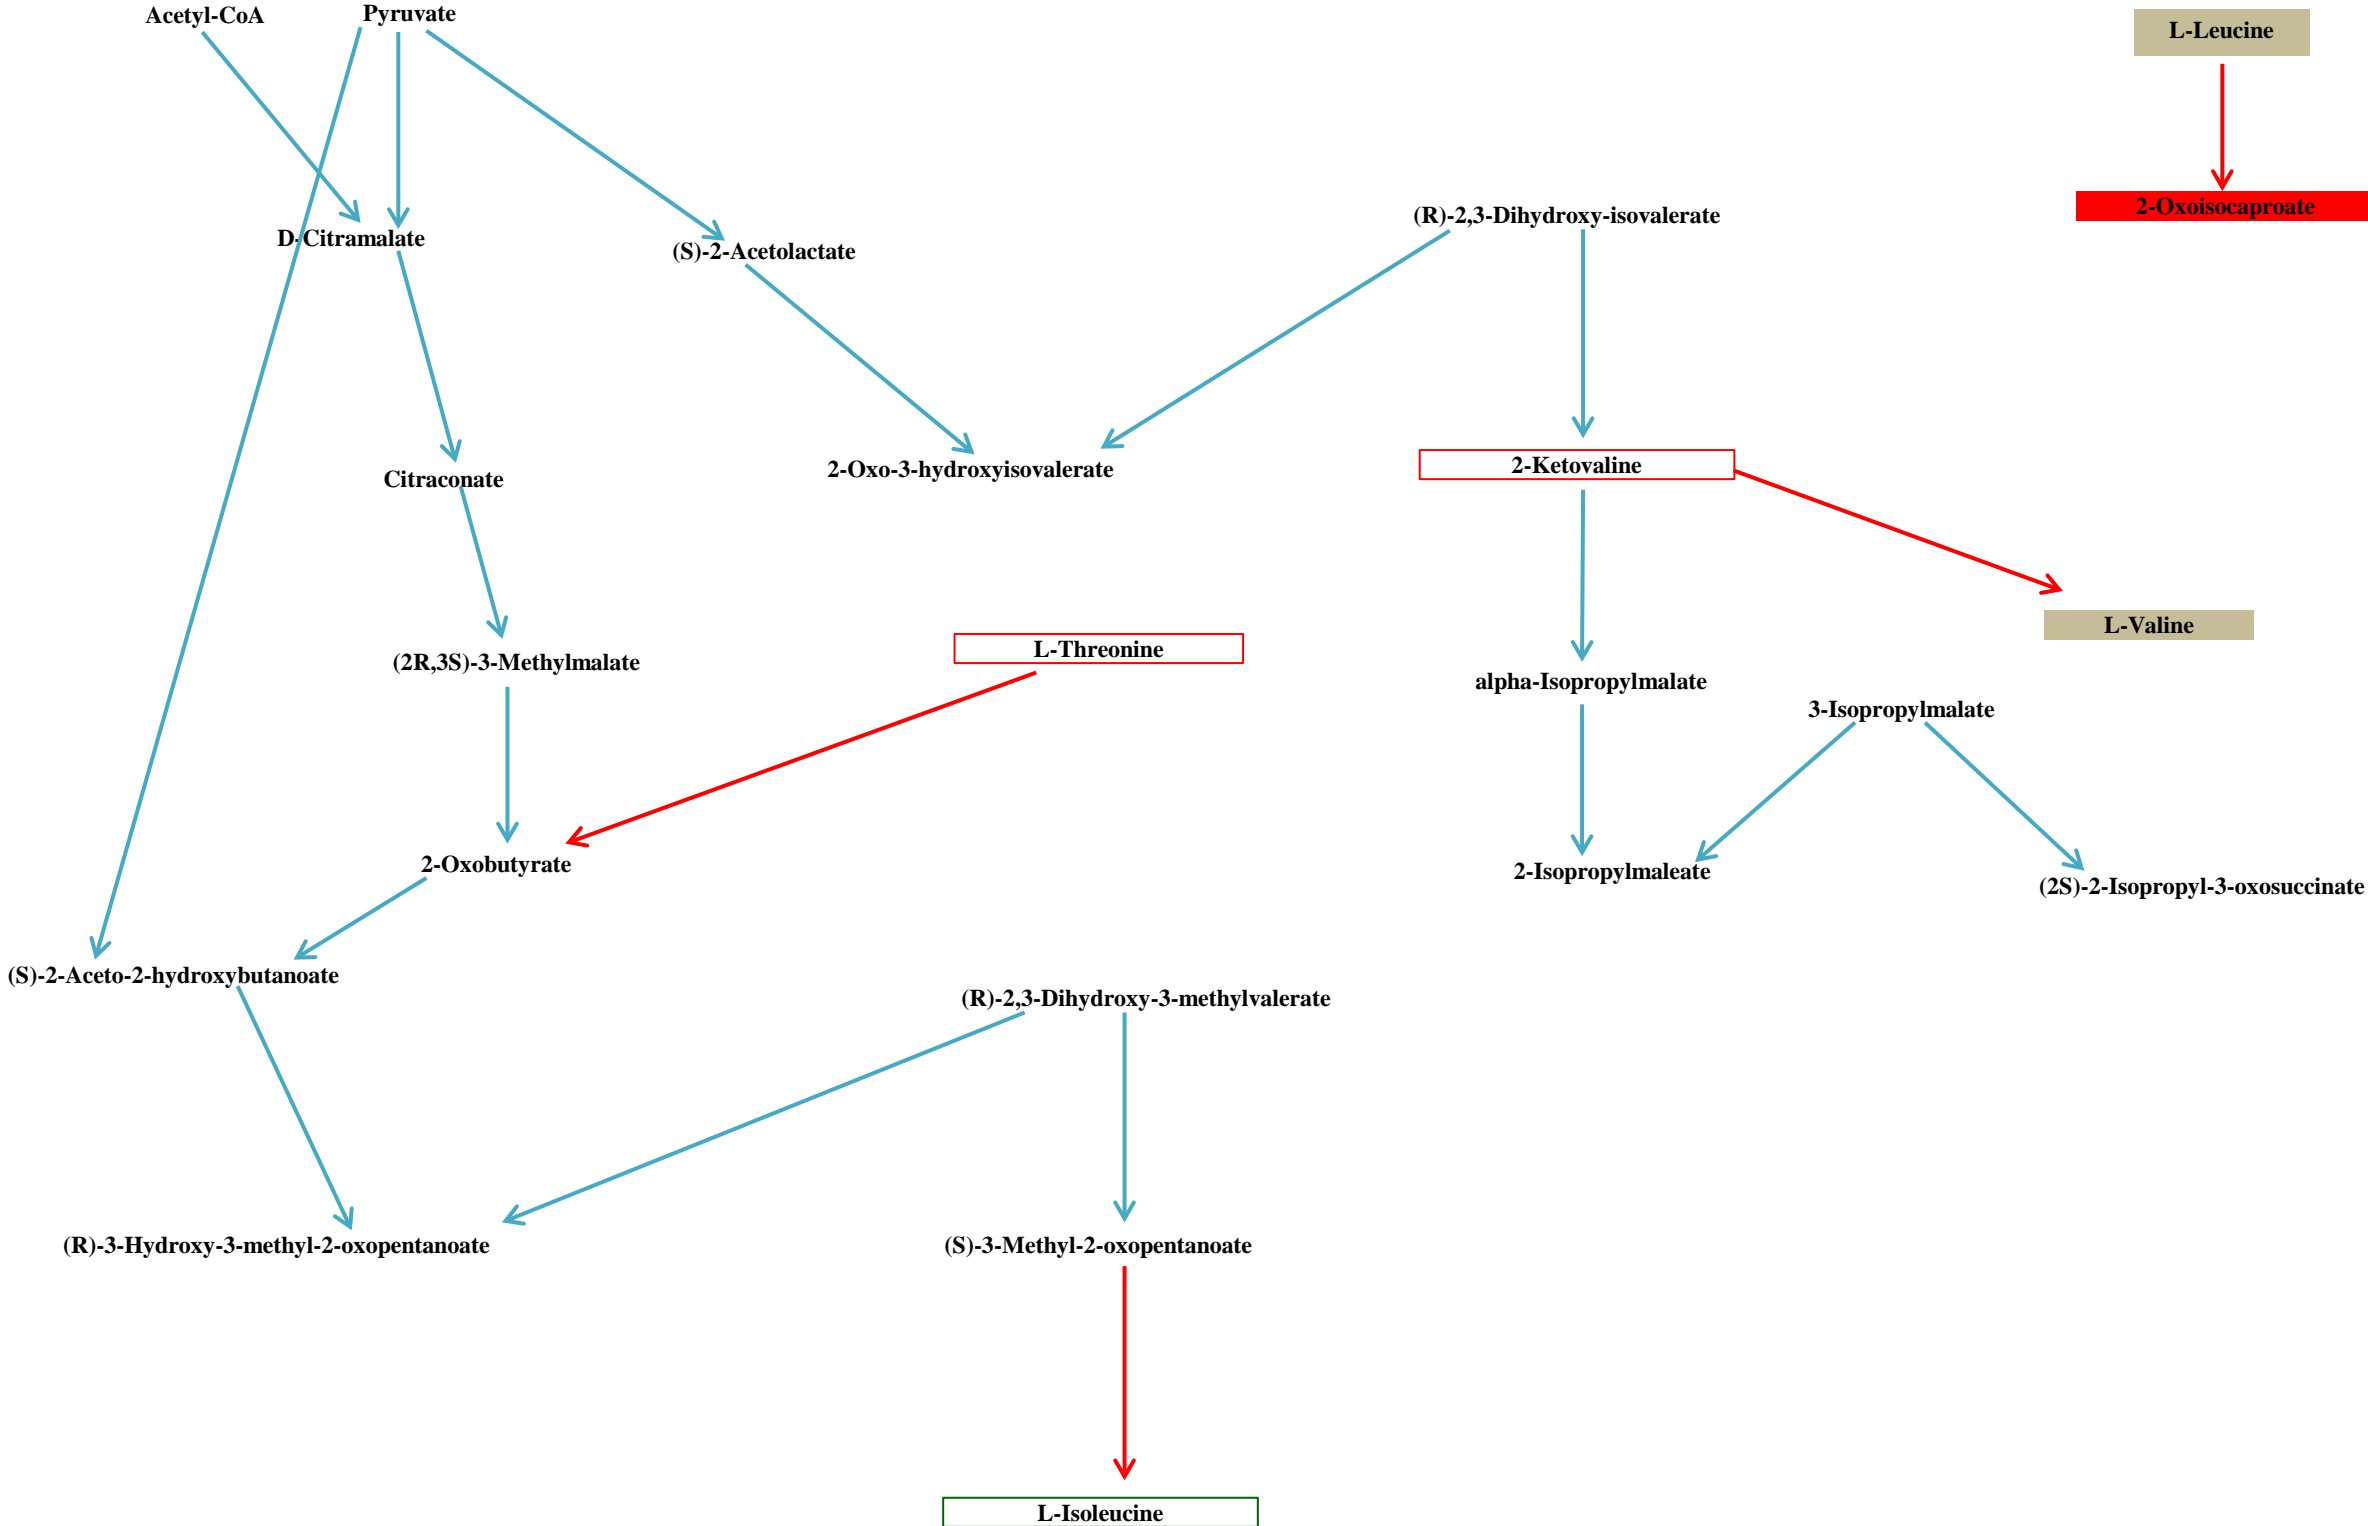



# Arginine biosynthesis

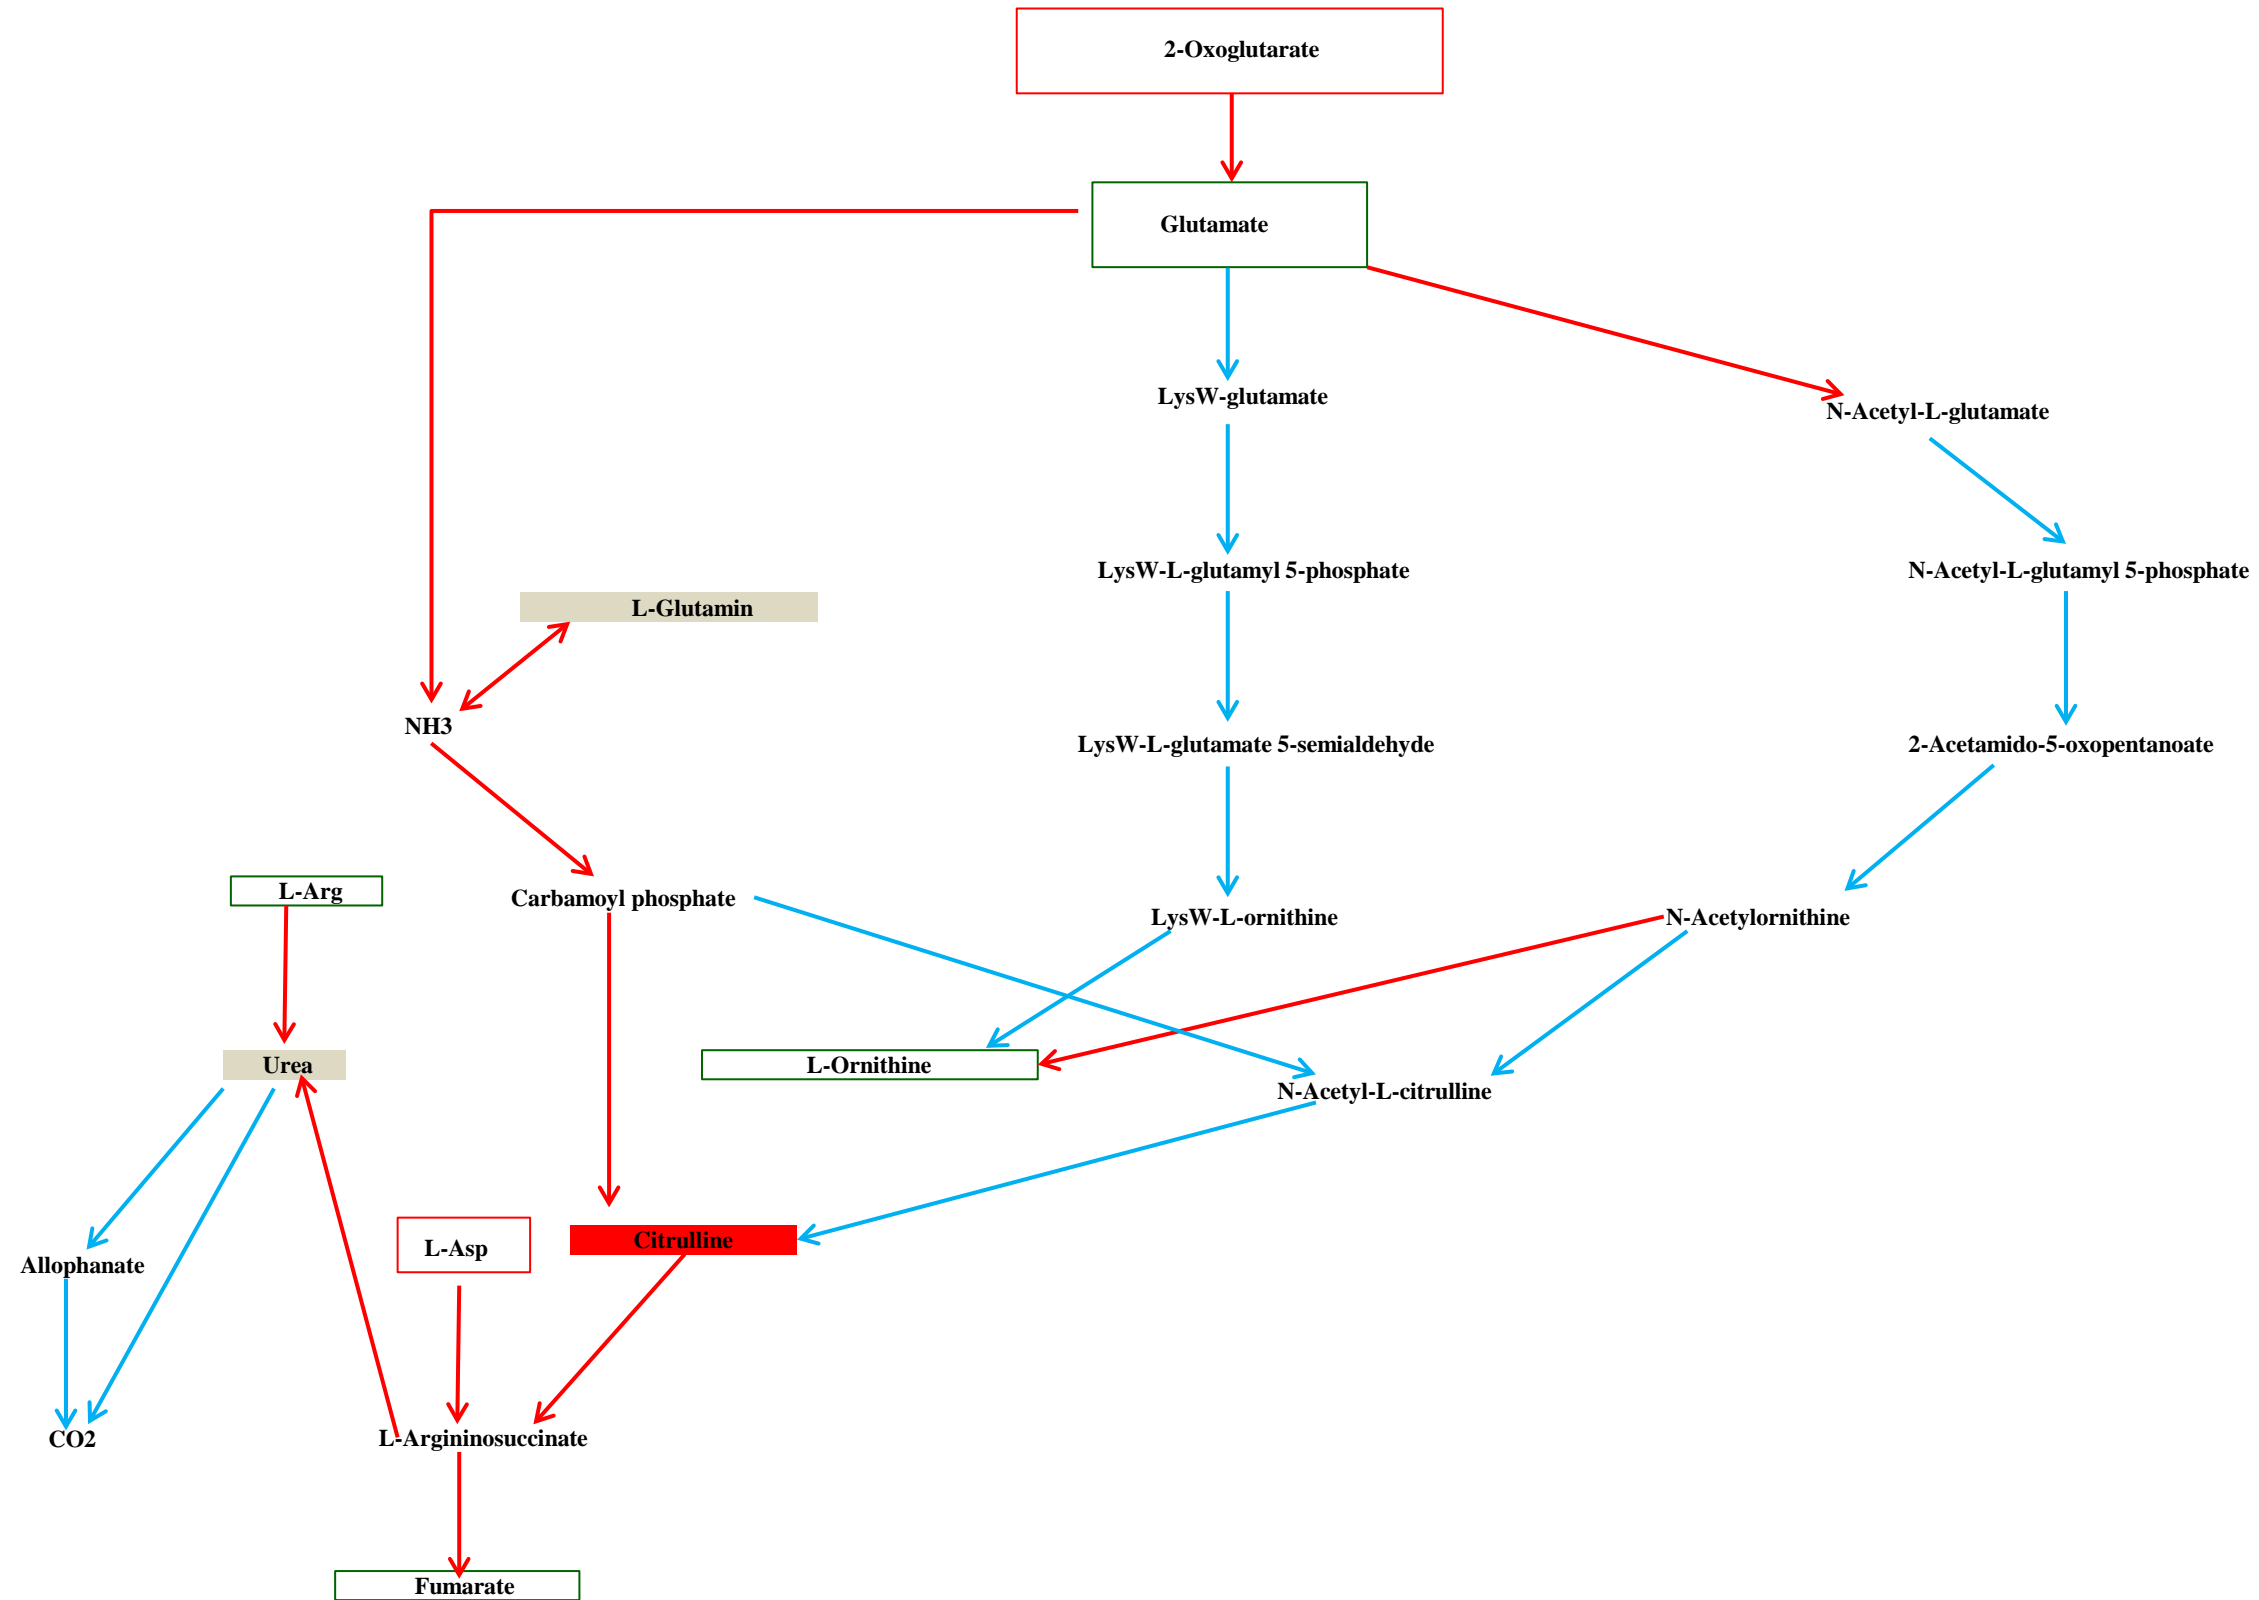

**Table S1 Groups and therapeutic regimens of GH and NVB in the recurrence Model**

| Group   | Number | Dosage                                                                                             |
|---------|--------|----------------------------------------------------------------------------------------------------|
| Control | 8      | 0.5% CMC-Na (0.1 ml/10 g, per day), saline(0.1 ml/10 g, per week)                                  |
| Model   | 8      | 0.5% CMC-Na (0.1 ml/10 g, per day), saline(0.1 ml/10 g, per week)                                  |
| GH      | 8      | 36 mg/kg Gh in 0.5% CMC-Na (0.1 ml/10 g, per day), saline(0.1 ml/10 g, per week)                   |
| NVB     | 8      | 0.5% CMC-Na (0.1 ml/10 g, per day), 4.15 mg/kg NVB in saline(0.1 ml/10 g, per week)                |
| GH-NVB  | 8      | 36 mg/kg Gh in 0.5% CMC-Na (0.1 ml/10 g, per day), 4.15 mg/kg NVB in saline(0.1 ml/10 g, per week) |
